1 **Fine-tuning biosensor dynamic range based on rational design of cross-ribosome-**  
2 **binding sites in bacteria**

3 Nana Ding<sup>a,b#</sup>, Shenghu Zhou<sup>a,b#</sup>, Zhenqi Yuan<sup>c,d</sup>, Xiaojuan Zhang<sup>a,b</sup>, , Jing Chen<sup>c,d\*</sup>,

4 Yu Deng<sup>a,b\*</sup>

5 <sup>a</sup> National Engineering Laboratory for Cereal Fermentation Technology (NELCF),

6 Jiangnan University, 1800 Lihu Road, Wuxi, Jiangsu 214122, China

7 <sup>b</sup> Jiangsu Provincial Research Center for Bioactive Product Processing Technology,

8 Jiangnan University

9 <sup>c</sup> School of Internet of Things Engineering, Jiangnan University, 1800 Lihu Road,

10 Wuxi, Jiangsu 214122, China

11 <sup>d</sup> Engineering Research Center of Internet of Things Technology Applications,

12 Ministry of Education, Wuxi 214122, China

13 \*Corresponding authors:

14 Yu Deng: National Engineering Laboratory for Cereal Fermentation Technology

15 (NELCF), Jiangnan University, 1800 Lihu Road, Wuxi, Jiangsu 214122, China, Email:

16 [dengyu@jiangnan.edu.cn](mailto:dengyu@jiangnan.edu.cn)

17 Jing Chen: School of Internet of Things Engineering, Jiangnan University, 1800 Lihu

18 Road, Wuxi, Jiangsu 214122, China, Email: [chenjing@jiangnan.edu.cn](mailto:chenjing@jiangnan.edu.cn)

19 # The authors contribute equally.

20

21

22

23 **ABSTRACT**

24 Currently, predictive translation tuning of regulatory elements to the desired output of  
25 transcription factor based biosensors remains a challenge. The gene expression of a biosensor  
26 system must exhibit appropriate translation intensity, which is controlled by the ribosome-binding  
27 site (RBS), to achieve fine-tuning of its dynamic range (i.e., fold change in gene expression between  
28 the presence and absence of inducer) by adjusting the translation initiation rate of the transcription  
29 factor and reporter. However, existing genetically encoded biosensors generally suffer from  
30 unpredictable translation tuning of regulatory elements to dynamic range. Here, we elucidated the  
31 connections and partial mechanisms between RBS, translation initiation rate, protein folding and  
32 dynamic range, and presented a rational design platform that predictably tuned the dynamic range  
33 of biosensors based on deep learning of large datasets cross-RBSs (cRBSs). A library containing  
34 24,000 semi-rationally designed cRBSs was constructed using DNA microarray, and was divided  
35 into five sub-libraries through fluorescence-activated cell sorting. To explore the relationship  
36 between cRBSs and dynamic range, we established a classification model with the cRBSs and  
37 average dynamic range of five sub-libraries to accurately predict the dynamic range of biosensors  
38 based on convolutional neural network in deep learning. Thus, this work provides a powerful  
39 platform to enable predictable translation tuning of RBS to the dynamic range of biosensors.

40

## 41 INTRODUCTION

42 Biosensors have gained major attention in the field of biotechnology <sup>1</sup> especially for monitoring  
43 metabolite formation <sup>2, 3</sup>. Genetically encoded biosensors derived from small-molecule inducer  
44 responsive transcription factors that produce fluorescence intensity proportional to the target  
45 metabolite concentration in the detection range have attracted substantial research attention <sup>3, 4</sup>.  
46 However, the existing genetically encoded biosensors generally have the drawback of inappropriate  
47 dynamic range (i.e., fold change in gene expression between the presence and absence of inducer)  
48 <sup>5-9</sup>. Dynamic range is an important indicator for fine-tuning biosensors, and a high dynamic range  
49 can help to distinguish the small difference in the inducer concentrations. The gene expression in  
50 biosensor systems driven by small molecule responsive transcription factors can achieve the desired  
51 output at appropriate translation initiation rates (TIR). One of the key elements to regulate the TIR  
52 is the ribosome-binding site (RBS), which tunes the dynamic range of the biosensor by adjusting  
53 the TIR of the transcription factor and reporter. However, the existing genetically encoded  
54 biosensors usually suffer from unpredictable translation tuning of regulatory elements to dynamic  
55 range. Many attempts have been made to tune the dynamic range of biosensors. For instance, Levin-  
56 Karp *et al.* used six RBSs ranging from strongest to weakest to achieve 20–200-fold dynamic range  
57 of protein expression <sup>10</sup>. Wang *et al.* tuned the dynamic range of device input and output using five  
58 various-strength RBSs (RBS30–RBS34) from the Registry of Standard Biological Parts, and  
59 showed that RBS could be used as a linear amplifier to regulate protein expression levels <sup>11</sup>.  
60 Although these methods might help to regulate the dynamic range of gene expression, the dynamic  
61 range of regulatory elements involved in gene expression could not be predicted. For example, if  
62 the RBS was changed, then obtaining the appropriate dynamic range of gene expression required  
63 time-consuming and laborious research.

64 Establishment of a predictable and robust method can quickly achieve translation tuning of the  
65 RBS to biosensor dynamic range. In a previous report, Salis *et al.* calculated the Gibbs free energy  
66 difference ( $\Delta G_{\text{tot}}$ ) between the initiation and termination states of protein translation initiation based  
67 on a thermodynamic model, and presented RBS calculator for designing and synthesizing the RBSs  
68 of genes of interest, ensuring the rational control of protein expression levels <sup>12</sup>. This significant  
69 contribution had accelerated the construction and optimization of complex genetic systems as well

70 as promoted the development of synthetic biology. However, synthesis of the RBS through the  
71 calculation of free energy lacked experimental support. Therefore, rational design of the RBS by  
72 using a large amount of experimental data could make research on the RBS synthesis more robust.  
73 However, a large RBS database must rely on powerful analysis tools for better utilization of their  
74 application value, which can be solved by using mathematical models such as deep learning. Deep  
75 learning is an algorithm that uses artificial neural networks as a framework to characterize and learn  
76 databases. Deep learning models based on sequence levels have broad application prospects in the  
77 field of synthetic biology. For example, Chen *et al.* established Selene, a PyTorch-based deep  
78 learning library, which enables researchers to easily train the existing models to process biological  
79 problems of interest based on new databases and can be applied to any biological sequence data,  
80 including DNA, RNA, and protein sequences <sup>13</sup>. Nielsen and Voigt used a deep learning based  
81 convolutional neural network (CNN) containing 42,364 plasmid DNA sequences datasets from  
82 Addgene to predict the lab-of-origin of a DNA sequence, and achieved 70% prediction accuracy  
83 and rapid analyses of DNA sequence information to guide the attribution process and understand  
84 the measures <sup>14</sup>. While these studies provide a window for translation tuning of the RBS to  
85 biosensors dynamic range, the ability to design biosensors with reasonable dynamic ranges still  
86 remains a challenge <sup>15-17</sup>.

87 In general, the RBS controls the translation initiation rate of a protein, thus affecting the protein  
88 expression level <sup>12</sup>. Therefore, in the study of biosensors, the RBS tunes the dynamic range of  
89 biosensors by regulating the expression of reporter and regulatory protein. In the present study, the  
90 RBS design principles for *cdaR* and *sfgfp* in glucarate biosensors were established. Subsequently, a  
91 library containing 24,000 cross-RBSs (cRBSs, combining RBSs of *cdaR* and *sfgfp* in glucarate  
92 biosensors) was constructed by using DNA microarray, which was divided into five sub-libraries  
93 through fluorescence-activated cell sorting (FACS). Finally, a CNN on the cRBSs libraries was  
94 trained and a classification model between cRBSs and average dynamic range of each sub-library  
95 was developed and was termed CLM-RDR, which performed well in predicting biosensors dynamic  
96 range (**Fig. 1**). The CLM-RDR used large RBS data according to a semi-rational design to provide  
97 a knowledge base for precise adjustment of biosensors dynamic range, thus helping researchers to  
98 better characterize biosensors dynamic range by using RBS datasets. Given the availability of a

99 large number of semi-rationally designed RBSs, the CLM-RDR classification model can be  
 100 extended to other biosensors to fine-tune their dynamic ranges, thereby significantly simplifying the  
 101 workload of the design–build–test–learn cycle for designing biosensors with moderate dynamic  
 102 ranges in bacteria and accelerating intelligent fine-tuning of biosensor dynamic range.

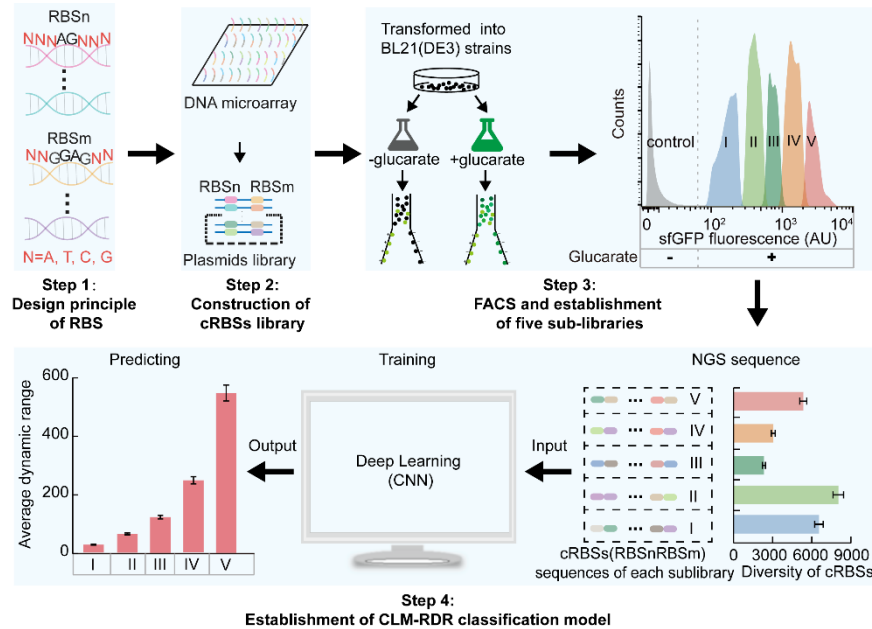

103

104 **Fig. 1 Workflow of CLM-RDR development.** First, the dynamic range of biosensors and the  
 105 sequences of their related cRBSs were analyzed to establish an RBS design principle (**Step 1**). Based  
 106 on this principle, a cRBSs library was designed and synthesized (**Step 2**) using DNA microarray.  
 107 Subsequently, the library was divided into five sub-libraries (I–V) based on the fluorescence  
 108 intensity of sfGFP measured by FACS (**Step 3**). Finally, to predict the dynamic range of biosensors  
 109 with the given cRBSs, NGS and CNN model were employed to analyze the sequences of cRBSs in  
 110 sub-libraries I–V and establish the CLM-RDR, respectively (**Step 4**). RBSn (NNNAGNNN), RBSs  
 111 of *cdar*; RBSm (NNGGAGNN), and RBSs of *sfGfp*; N = A, T, C, G.

## 112 RESULTS

### 113 RBS plays a crucial role in the regulation of biosensor dynamic range

114 Although recent advances in synthetic biology have shed light on the importance of fine-tuning  
 115 of biosensor dynamic range in various fields, the ability to design biosensors with moderate dynamic  
 116 ranges remains limited<sup>9, 18-20</sup>. To investigate the key factors in biosensor dynamic range regulation,  
 117 we used glucarate biosensor and explored its response strength by employing diverse concentrations

118 of glucarate for induction (**Supplementary Fig. 1a, b**). Addition of 20 g/L glucarate biosensor  
119 presented the highest nine-fold dynamic range. However, the fluorescence intensity presented a  
120 downward trend when the glucarate concentration exceeded 20 g/L (**Supplementary Fig. 1b**).  
121 Similar observations have also been noted for other biosensors, such as *acuR*-based 3-  
122 hydroxypropionate biosensor <sup>3</sup>, which also exhibited downward trend of fluorescence intensity  
123 when cerulenin concentration exceeded a certain threshold value. This phenomenon may be owing  
124 to the rapid translation and transcription of sfGFP, which not only cause metabolic burden (slow  
125 growth) (**Supplementary Fig. 1c**) to the living cells, but also affect the natural folding of sfGFP <sup>21</sup>,  
126 thus resulting in low fluorescence intensity. Faure *et al.* indicated that the occurrence of misfolding  
127 proteins increases with the increasing translation speed <sup>22</sup>. Thus, although the amount of expressed  
128 sfGFP increased (**Supplementary Fig. 1d**), the fluorescence intensity per protein molecule  
129 significantly decreased when glucarate concentration exceeded 20 g/L, owing to excessive  
130 misfolding. A similar trend was also observed for CdaR. Therefore, it can be assumed that the most  
131 critical challenge for fine-tuning the dynamic range of biosensors might be to balance the translation  
132 rate of regulator and reporter to simultaneously achieve the desired total fluorescence intensity with  
133 the highest fluorescence intensity per protein molecule (**Fig. 2a**). These findings suggested that RBS  
134 might probably be a key element affecting the dynamic range of biosensors.

135 To investigate the correlation between RBS and biosensor dynamic range, nine RBSs covering a  
136 wide range of TIR from weak to strong were chosen for combinatorial replacement of the RBSs of  
137 *cdaR* and *sfgfp* (**Fig. 2b**). The nine RBSs selected were RBS (R) and G10RBS (G10) derived from  
138 the plasmid pJKR-H-*cdaR* <sup>4</sup>; RBS3 (R3), RBS7 (R7), and RBS8 (R8) designed with an RBS  
139 calculator <sup>12</sup>; MCD2 (M2) and MCD10 (M10) derived from the monocistronic design by Mutalik *et*  
140 *al.* <sup>23</sup>; and BBa\_J61100 (BJ00) and BBa\_J61106 (BJ06) obtained from the Anderson RBS library.  
141 Finally, 81 cRBS glucarate biosensors were obtained and their response strength and dynamic range  
142 were significantly improved when induced with various concentrations of glucarate (**Fig. 2c**,  
143 **Supplementary Fig. 2a, b**). In the cRBSs of R7M10 and RM10, 205-fold and 118-fold dynamic  
144 ranges were observed, respectively, depending on glucarate concentration (20 g/L), which were  
145 higher than that of the control RG10 (9-fold), indicating that the RBS played a very important role  
146 in fine-tuning biosensor dynamic range.

147 To validate whether the effect of cRBSs on the biosensor dynamic range was independent of  
148 reporter genes, we selected three cRBS biosensors with distinct dynamic ranges (RG10, RR8, and  
149 RM10) to replace *sfgfp* with *lacZ*. By comparing LacZ enzyme activity and sfGFP expression  
150 intensity, we found that the three cRBSs showed the same expression intensity trend regardless of  
151 the reporter gene (*sfgfp* or *lacZ*) (**Fig. 2d**). This finding indicated that the cRBSs could consistently  
152 fine-tune the dynamic range of biosensor irrespective of the reporter. Subsequently, we analyzed the  
153 datasets with and without 20 g/L glucarate to assess the significance of differential expressions of  
154 genes with 81 cRBSs. We found that 63% of the 81 cRBSs were available for analysis ( $P < 0.05$ ),  
155 and that 24.7% of the cRBSs showed significant differential expression (**Fig. 2e**). Moreover, 11.1%  
156 of the 81 cRBSs were significantly differentially expressed, when compared with the control (RG10)  
157 (**Fig. 2e**). To verify whether RBS was the most critical factor affecting the dynamic ranges of  
158 glucarate biosensors, we performed analysis of variance (ANOVA) on cRBSs and glucarate datasets  
159 (**Fig. 2f**). The results suggested that cRBSs and glucarate contributed 84% and 13% to biosensor  
160 fine-tuning, respectively. In addition, an interaction (2%) between the two factors was also noted  
161 (**Supplementary Table 1, see online methods**). These results indicated that the RBS is a key  
162 element for tuning the dynamic range of biosensors. However, it is still unclear on how the RBS  
163 fine-tunes the biosensor dynamic range.

### 164 **The RBS fine-tunes biosensor dynamic range by controlling protein translation** 165 **and folding**

166 To explore the relationship between TIR and dynamic range, total Gibbs free energy of the two  
167 variables, RBSn and RBSm, were respectively analyzed by using the RBS calculator<sup>12</sup>  
168 (**Supplementary Table 2**). Under the same RBSn, the optimal TIR of RBSm produced the highest  
169 biosensor dynamic range, and similar trend was also found for the TIR of RBSn under the same  
170 RBSm (**Fig. 2g, Supplementary Fig. 2c, d**), suggesting that the maximum dynamic range can be  
171 achieved at optimal TIR. However, TIR higher than the optimal TIR could cause low biosensor  
172 dynamic range, which could be due to the rapid expression of sfGFP resulting in misfolding or  
173 unfolding, thus affecting the natural folding of sfGFP<sup>22,24</sup>. Therefore, we hypothesized that the RBS  
174 could affect protein folding by regulating the TIR of protein.

175 To examine the relationship between dynamic range and protein folding, the reported wild-type

176 chaperone ring complex, GroEL/S, which has the ability to assist in the folding of heterologous  
177 protein in *Escherichia coli*<sup>25</sup>, was used to verify the effect of the RBS on sfGFP folding. Five cRBSs  
178 (RR8, RM10, RR3, RM2, and RG10) with different TIRs were used to investigate the misfolding  
179 and repair of sfGFP. The fluorescence changes with and without GroEL/S were explored by flow  
180 cytometry upon addition of 20 g/L glucarate (**Fig. 2h**). SDS-PAGE revealed that the increase in  
181 fluorescence intensity of each cRBS was not caused by different expression levels of sfGFP, but  
182 was caused by GroEL/S repairing misfolded or unfolded sfGFP to a natural folded state  
183 (**Supplementary Fig. 2e**). Furthermore, the repair rate, dynamic range, TIR, and sfGFP expression  
184 levels were calculated, which indicated that sfGFP expression was positively correlated with repair  
185 rate, while optimal TIR was more beneficial for achieving higher biosensor dynamic range (**Fig. 2h**,  
186 **Supplementary Fig. 2f–2h**). This finding was consistent with our hypothesis, implying that strong  
187 RBSs have high TIR, which not only promotes the translation of sfGFP, but also results in high  
188 misfolding rate and repair rate. Although dynamic range is a comprehensive phenomenon indicating  
189 the amounts and folding state of sfGFP, it is difficult to establish a quantitative equation to define  
190 the relationship between the RBS, TIR, folding, and dynamic range, which severely hinders the  
191 development of rational design of biosensors.



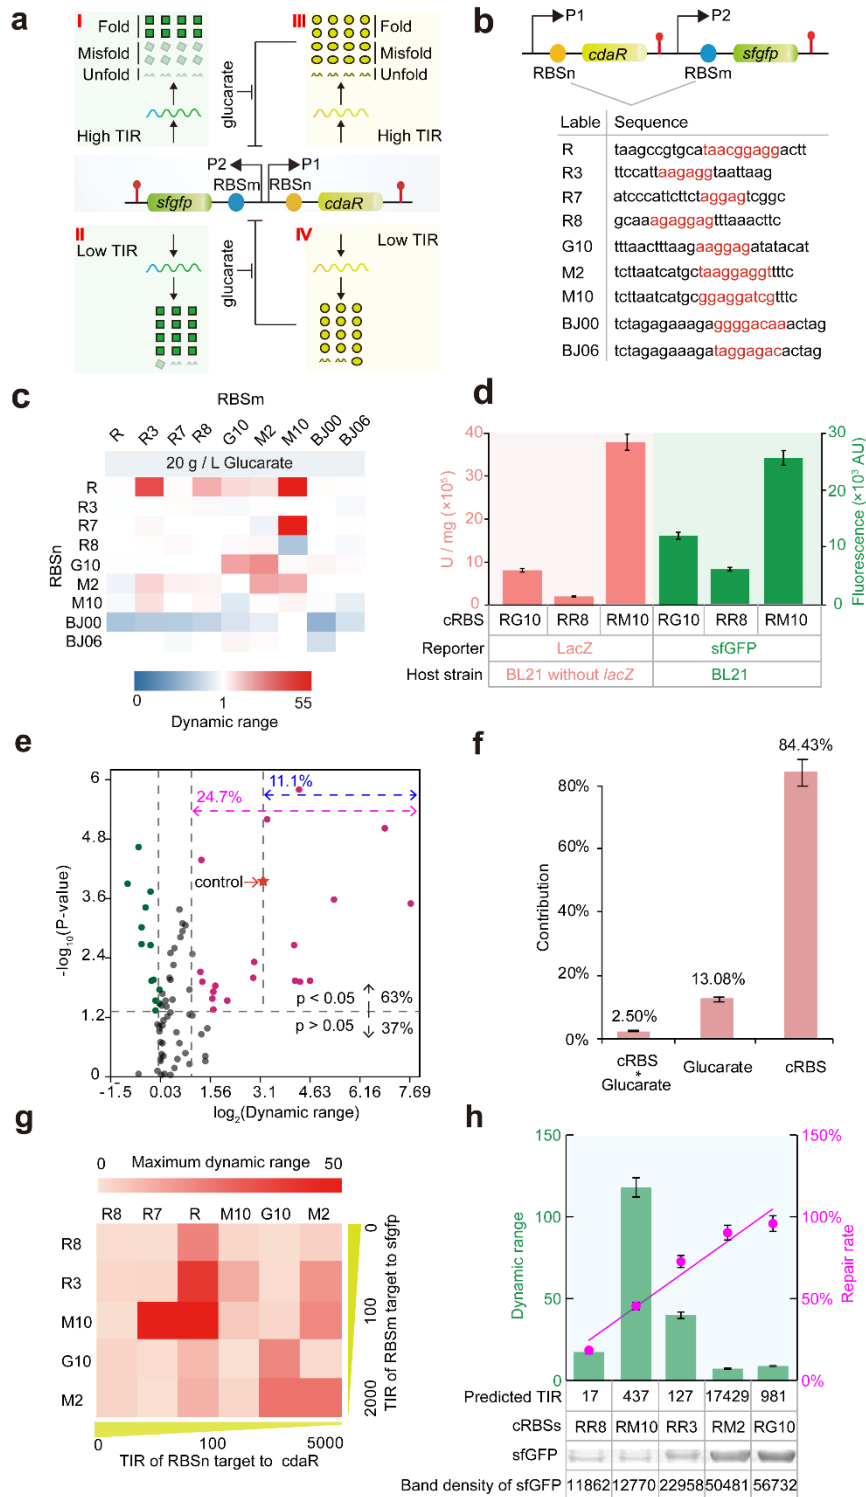

192

193 **Fig. 2 Effects of cRBSs on biosensor dynamic range.** (a) Hypothesis indicating that RBS affects  
 194 protein folding. TIR coordinates both protein expression and folding state. (b) Nine RBS sequences  
 195 derived from various libraries were obtained to replace the RBSs of glucarate biosensor. (c) The  
 196 dynamic ranges of 81 cRBS glucarate biosensors induced with different concentrations of glucarate.  
 197 cRBSs are defined as the RBS combination of *cdaR* (RBSn) and *sfGFP* (RBSm); for example, RM10

198 (R represents the RBSn of *cdaR*, M10 denotes the RBSm of *sfgfp*). **(d)** Comparison of LacZ enzyme  
199 activity and sfGFP expression intensity in three cRBS glucarate biosensors controlled by two  
200 reporter genes. Red column, LacZ enzyme activity; Green column, fluorescence intensity. **(e)**  
201 Volcano plot of cRBS datasets. The horizontal gray dashed line indicates a P-value of 0.05. The  
202 upper part ( $P < 0.05$ ) represents the significant cRBS datasets. The vertical gray dashed line from  
203 left to right denotes the onefold, twofold, and nine-fold dynamic range. The pink and blue double  
204 arrows represent the significantly different cRBS datasets. Red star indicates the ninefold dynamic  
205 range of the control cRBS (RG10). **(f)** ANOVA for mean-normalized dynamic range from cRBSs  
206 and glucarate concentration datasets, with element- and junction-specific contributions to total  
207 dynamic range as noted (**Materials and Methods**). **(g)** Effect of TIR on the dynamic range of  
208 glucarate biosensor. Yellow triangle bars represent the increasing TIRs of RBSn and RBSm for *cdaR*  
209 and *sfgfp*, respectively. **(h)** Analysis of the dynamic range of biosensor and repair rate of sfGFP  
210 based on the distinct TIRs and sfGFP expression of RBSs. The correlation coefficient square ( $R^2$ )  
211 of the fitted curve of the repair rate was 0.95. Band density was measured using ImageJ software;  
212 green columns represent the dynamic range of the biosensor; pink circles indicate the repair rate of  
213 sfGFP controlled by different cRBSs; repair rate is calculated as:  $(Flu(\text{GroELS}+) - Flu(\text{GroELS}-))$   
214  $/ Flu(\text{GroELS}+)$ , where Flu denotes fluorescence intensity.

## 215 **Semi-rational design of the RBS to fine-tune biosensor dynamic range**

216 Owing to the lack of quantitative relation between the RBS, TIR, folding, and dynamic range, it  
217 is possible to simulate and predict the biosensor dynamic range by mathematical models. As an  
218 alternative method, deep learning could predict complex biological relationships with simple neural  
219 network models, thereby circumventing the steps to understand the complicated biological  
220 mechanisms and achieving the expected effects of simulation and prediction. To obtain large data  
221 to train CNN model, we first accomplished rational designing of the RBS and further tuned the  
222 dynamic range of the biosensor. On the basis of the 81 cRBSs datasets, the conserved sequences of  
223 the RBSs in *cdaR* and *sfgfp* were generated by using the online software WebLogo<sup>26</sup>. The  
224 engineered RBSs could be divided into a consensus sequence defined as upstream and downstream  
225 of the Shine-Dalgarno (SD) sequence (RBSn: TAACCATGCATA-SDn-GACTT for *cdaR*; RBSm:

226 TCTTAATCATG-SDm-GGTTTC for *sfgfp*) and an SD preference sequence (SDn: NNGGAGNN  
227 for *cdaR*; SDm: NNGGANN for *sfgfp*; N = A, T, C, G) (**Fig. 3a, b**).

228 To evaluate the reliability of this design principle of RBSs, we randomly constructed 400 cRBSs  
229 ( $20 \times 20$  RBSs, 20 RBSs of *cdaR* and *sfgfp*) (**Supplementary Table 3**). The fluorescence intensity  
230 and dynamic range of the 400 cRBSs biosensors with glucarate inducer showed a significant  
231 improvement, when compared with those without the inducer (**Supplementary Fig. 3**). In addition,  
232 the cRBSs biosensors presented an improved dynamic range upon addition of 20 g/L glucarate,  
233 when compared with the control (**Fig. 3c**). These findings implied that semi-rational design of  
234 cRBSs was more reliable and robust in improving the biosensor dynamic range. We further analyzed  
235 the datasets with and without glucarate to assess the differential expression of sfGFP, and found that  
236 up to 98% of the 400 cRBSs were available for analysis ( $P < 0.05$ ) and 85.3% of the cRBSs showed  
237 significant differential expression (**Fig. 3d**). In particular, 35.3% of the 400 cRBSs presented  
238 significant differential expression, when compared with the control (RG10) (**Fig. 3d**). These results  
239 indicated that the semi-rational design of cRBSs considerably contributed to the improvement of  
240 biosensor dynamic range.

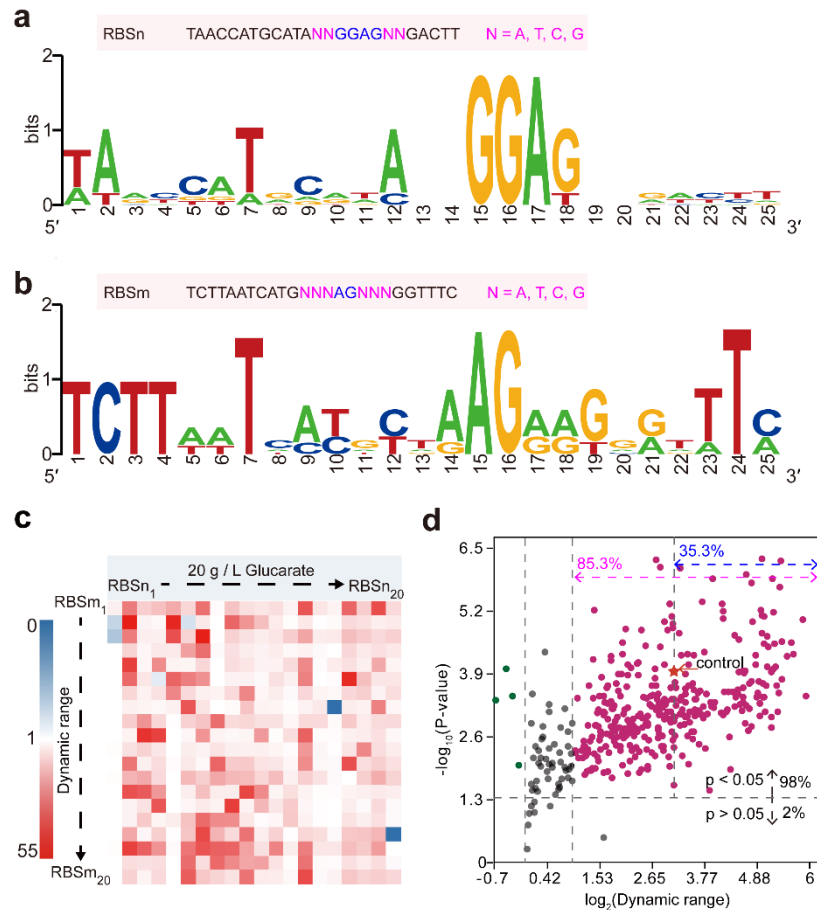

241

242 **Fig. 3 Semi-rational design of RBSs.** The semi-rational design principle of (a) RBSn (RBSs of  
243 *cdaR*) and (b) RBSm (RBSs of *sfgfp*) was obtained based on the 81 cRBSs sequences using the  
244 online software WebLogo. (c) Biosensors dynamic ranges of 400 cRBSs, which were designed by  
245 the semi-rational design principle of RBSs, were calculated upon the addition of 20 g/L glucarate.  
246 (d) Volcano plot of 400 cRBSs datasets. The horizontal gray dashed line represents a P-value of  
247 0.05. The upper part ( $P < 0.05$ ) denotes the significant cRBS datasets. The vertical gray dashed line  
248 from left to right indicates onefold, twofold, and ninefold dynamic range. The pink and blue double  
249 arrows show the significantly different cRBS datasets. Red star represents the ninefold dynamic  
250 range of the control cRBS (RG10).

### 251 Establishment of CLM-RDR for precise prediction of biosensor dynamic range

252 To further extend the dataset for CNN model training, we constructed a much larger cRBS library  
253 through the RBS semi-rational design approach, and generated 100 RBSs for *cdaR* and 120 RBSs  
254 (Supplementary Table 3) for *sfgfp* (Fig. 3a, b). Then, a combinatorial library of 12,000 cRBSs as  
255 oligonucleotides was developed with DNA microarray (see online methods). To verify the

256 homogeneity of the 12,000 cRBSs, next-generation sequencing (NGS) was performed. The  
257 coverage of the 12,000 cRBSs was 100%, and the 10-fold variation reached a quality control value  
258 of 99.92% (**Supplementary Fig. 4a, Supplementary Data 1, Accession No. SRR9301216**). This  
259 cRBS library was used in the following pooled screening experiment to characterize the dynamic  
260 range of the glucarate biosensor.

261 The 12,000 cRBS plasmid library was transformed into *Escherichia coli* (*E. coli*) BL21 (DE3)  
262 cells, which were cultured for 8 h in Luria–Bertani (LB) medium supplemented with 0 or 20 g/L  
263 glucarate. Then, by using FACS, we divided the cells induced with 20 g/L glucarate into five non-  
264 adjacent sub-libraries I–V according to the expression intensity of sfGFP, and compared them with  
265 the control without glucarate induction (**Fig. 4a**). Subsequently, the average single cell fluorescence  
266 intensity and average dynamic range of the sub-library I–V and control were calculated, and a 26-  
267 fold, 63-fold, 121-fold, 246-fold, and 545-fold average dynamic range were accomplished for the  
268 sub-libraries I–V, respectively (**Fig. 4b**). These results further demonstrated that the cRBS semi-  
269 rational design approach was highly effective in tuning the dynamic range of the glucarate biosensor,  
270 and helped to establish a high-quality element library in synthetic biology and construct an approach  
271 for designing complex genetic circuits to fine-tune gene expression <sup>27-29</sup>.

272 To determine the cRBS sequences of the glucarate biosensors in each sub-library, we first  
273 obtained the assorted biosensor plasmids of the five sub-libraries. Then, the mixed PCR products of  
274 the five modified sub-libraries were linked with five barcodes and sequenced by NGS <sup>30</sup> (**Accession**  
275 **No. SRR9301175; see online methods**). Box plots showed the distribution of each cRBS count of  
276 five sub-libraries, and separate points indicated that the cRBS numbers ranged from 10 to 10<sup>5</sup> (**Fig.**  
277 **4c, Supplementary Data 2**). In addition, the diversity of cRBSs in each sub-library was analyzed,  
278 and there were 6219, 7630, 2214, 2892, and 5079 cRBSs in sub-libraries I–V, respectively (**Fig. 4d**).  
279 Besides, more than 12,000 cRBSs were found, possibly because of mutations introduced into the  
280 sequence through bacterial evolution during cultivation. Although the mutation rates of the  
281 consensus sequences of RBSn and RBSm in the five sub-libraries were 0.15, 0.19, 0.06, 0.09, and  
282 0.15, respectively, and they did not affect subsequent model development (**Supplementary Data**  
283 **2**). Therefore, to ensure data integrity, the sequenced 24,000 cRBSs were used as the data sources  
284 for further data processing.

285 Although the cRBSs sequences of each sub-library were obtained, it was extremely crucial to  
286 determine the functional relationships between the cRBSs sequences and average dynamic range of  
287 glucarate biosensor. Functional relationships could help to quickly analyze the dynamic range of a  
288 corresponding cRBS biosensor, which could reduce the burden of the design–build–test–learn cycle.  
289 Therefore, CNNs of deep learning was chosen to establish a classification model between cRBSs  
290 and the average dynamic range of each sub-library (CLM-RDR). The cRBSs and average dynamic  
291 range of sub-libraries I–V were the input and output of CLM-RDR, respectively. First, 85% of the  
292 cRBSs in each sub-library were randomly selected as datasets to train the CNN model  
293 (Supplementary Fig. 5). Next, we evaluated how well CLM-RDR predicted the average dynamic  
294 range of the glucarate biosensor from the remaining 15% of cRBSs sequences in each sub-library  
295 (Fig. 4e). The results indicated that CLM-RDR predicted the dynamic range of the glucarate  
296 biosensor with high accuracy, yielding an area under the curve (AUC) of 0.83, 0.87, 0.90, 0.92, and  
297 0.94 for sub-libraries I–V, respectively, and an average AUC of 0.89. Moreover, CLM-RDR  
298 performed better in predicting sub-libraries with high dynamic range, when compared with that with  
299 low dynamic range, implying that cRBSs in the high dynamic range could more easily achieve fine  
300 tuning of the biosensor dynamic range.

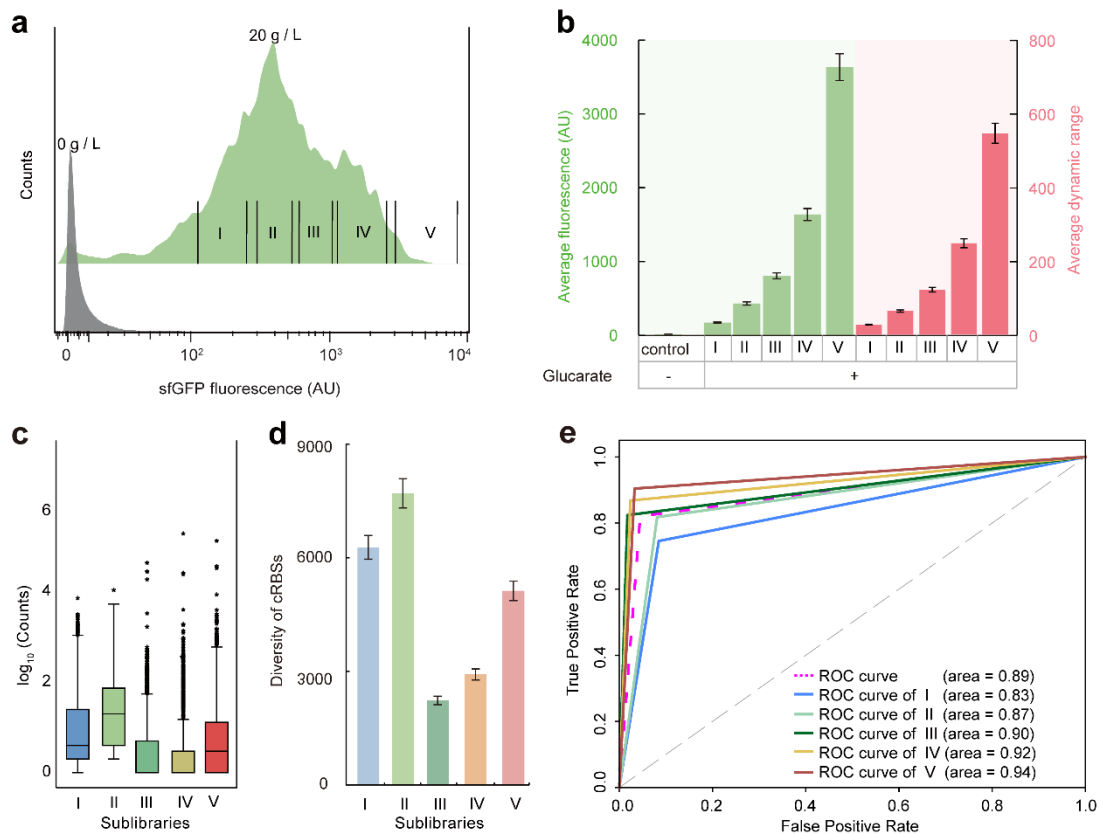

302 **Fig. 4 Accurate prediction of the dynamic range of glucarate biosensor from cRBS sequences**  
303 **by deep learning model. (a)** A larger cRBSs library was formed than the original libraries. Division  
304 of cells induced with 20 g/L glucarate into five non-adjacent sub-libraries (I–V), which were  
305 compared with the control (0 g/L glucarate) based on the expression intensity of sfGFP measured  
306 by FACS. **(b)** Analysis of average fluorescence intensity (green column) and average dynamic range  
307 (red column) of each sub-library and control. **(c)** The counts of each cRBS of the five sub-libraries  
308 were obtained by NGS. **(d)** Diversity of cRBSs of five sub-libraries. **(e)** Establishment of CLM-  
309 RDR based on 24,000 cRBS sequences. Receiver operating characteristic (ROC) curves for cRBSs  
310 of sub-libraries I–V (solid lines of various colors) and total library (pink dotted line). Biosensor  
311 dynamic ranges with five test-positive samples were used to classify.

### 312 **Applications of the CLM-RDR to other biosensors**

313 The CLM-RDR is expected to tune the dynamic range of different biosensors. Therefore, to  
314 further evaluate the performance of the CLM-RDR, we randomly selected 16 cRBSs to modify the  
315 glucarate biosensor, glycolate biosensor, and arabinose biosensor (**see online methods**). We first  
316 predicted the average dynamic range of 16 cRBSs by using CLM-RDR and then performed an  
317 experiment to detect the dynamic ranges of the biosensors via FACS (**Supplementary Fig. 6**). By  
318 analyzing the predicted and experimentally observed dynamic ranges, CLM-RDR was found to have  
319 good predictive performance for three biosensors. Predicted accuracy rates of 62.5% (**Fig. 5a**), 62.5%  
320 (**Fig. 5b**), and 68.75% (**Fig. 5c**) were obtained for glucarate, arabinose (**Fig. 5d**), and glycolate (**Fig.**  
321 **5e**) biosensors, respectively. These results indicated that the CLM-RDR had a certain degree of  
322 universality in predicting the dynamic ranges of biosensors. The CLM-RDR can probably be further  
323 improved by providing additional training datasets.

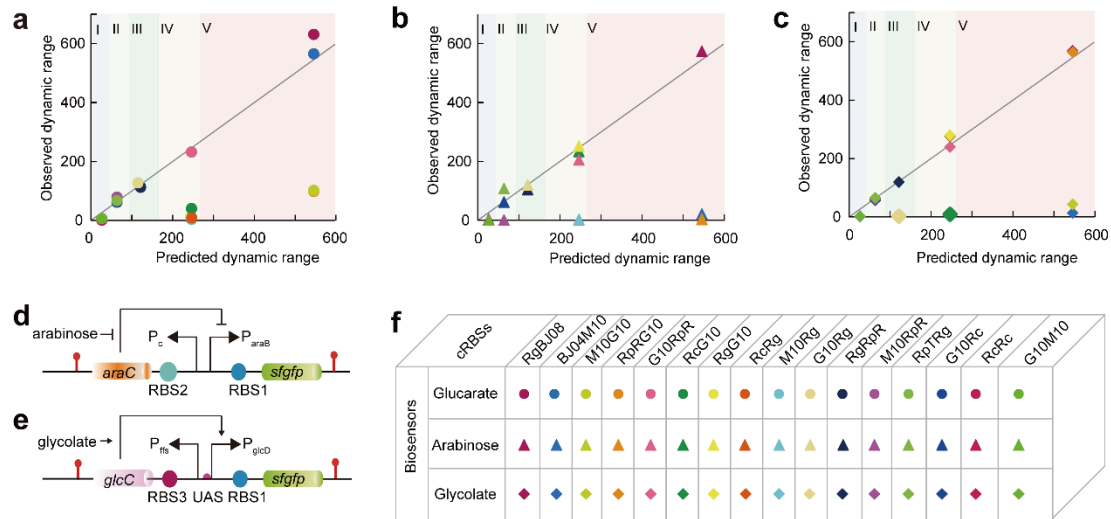

324

325 **Fig. 5** CLM-RDR verification for three genetically encoded biosensors. Sixteen cRBSs were  
 326 randomly selected for biosensor modification and comparison of the observed and predicted  
 327 dynamic ranges. The CLM-RDR performed well in predicting the dynamic ranges of (a) glucarate  
 328 biosensor, (b) arabinose biosensor, and (c) glycolate biosensor. I–V represent the five sub-libraries  
 329 of cRBSs. The black diagonal denotes  $y = x$ . (d) Structure of  $P_{araB}$ -based arabinose sensor.  $P_c$   
 330 represents the constitutive promoter that controls transcription of the regulatory protein AraC.  $P_{araB}$   
 331 is an inducible promoter containing the AraC-binding DNA sequence. Blunt-end arrows denote  
 332 repression. (e) Structure of  $P_{glcD}$ -based glycolate sensor.  $P_{fis}$ <sup>31</sup> indicates the constitutive promoter  
 333 that controls transcription of the regulatory protein GlcC.  $P_{glcD}$  is a constitutive promoter that  
 334 controls the transcription of the reporter sfGFP. In the absence of glycolate, GlcC remained as a  
 335 non-functional regulatory protein, whereas in the presence of glycolate, the regulatory protein GlcC  
 336 and glycolate bound to the activator GlcC-glycolate, which in turn bound to the upstream activation  
 337 site (UAS) of the promoter  $P_{glcD}$ , thus enhancing transcription and expression of *sfGFP*. Pointed  
 338 arrows indicate activation. (f) Detailed illustration of 16 cRBSs and three biosensors. Solid circle:  
 339 glucarate biosensor; solid triangle: arabinose biosensor; solid diamond: glycolate biosensor.

### 340 Software package

341 To encourage experimental biologists to use CLM-RDR, we uploaded the model to GitHub,  
 342 which converted an RBS sequence directly into biosensor dynamic range. The code for predicting  
 343 biosensor dynamic range can be found at <https://github.com/YuDengLAB/CLM-RDR>.



## 344 **DISCUSSION**

345 Genetically encoded biosensors derived from transcription factors responding to small-molecule  
346 inducers are receiving increasing research attention<sup>3</sup>. The currently available genetically encoded  
347 biosensors usually have the major problem of inappropriate dynamic range<sup>6, 8</sup>. Although many  
348 valuable works, such as promoter modification studies, have attempted to tune the dynamic range  
349 of biosensors, universality may be difficult to achieve owing to small datasets and insufficient  
350 analysis tools. Therefore, fine-tuning of the biosensor dynamic range remains a huge challenge<sup>5, 17</sup>.  
351 In general, RBS controls the translation initiation rate<sup>12, 23</sup> of regulatory proteins and reporters,  
352 which can control the dynamic range of biosensors. Previous reports had indicated that the dynamic  
353 ranges of device input or output were not well tuned by replacing the RBS<sup>10</sup>, mainly because the  
354 RBS design was not sufficiently rational and the RBS datasets were limited. Therefore, to fine-tune  
355 the dynamic range of biosensors, in the present study, we established the design principle of the  
356 RBS in biosensors through ANOVA and online WebLogo processing. Accordingly, 12,000 cRBSs  
357 were semi-rationally designed based on the design principle, and five average dynamic ranges were  
358 calculated by dividing the cRBSs into five sub-libraries using FACS. Most importantly, we  
359 developed CLM-RDR, a classification model between cRBSs and average dynamic range of five  
360 sub-libraries. The CLM-RDR showed accurately predictive performance and was able to quickly  
361 determine the average dynamic range of a biosensor corresponding to a cRBS. In addition, the CLM-  
362 RDR also had good predictive ability toward glycolate and arabinose biosensors, thus indicating  
363 that this model can be extended to other biosensors. Besides, the developed model significantly  
364 simplified the workload of the design–build–test–learn cycle of fine-tuned biosensor dynamic range  
365 in bacteria and accelerated intelligent fine-tuning of biosensor dynamic range.

366 RBSs play a role in fine-tuning genetic components and determining the TIR of proteins<sup>12, 23</sup>.  
367 Proteins usually present tight and loose structures. The mRNA structure affects the translation rate  
368 of a protein, and fast translation prevents the formation of compact structures, which affects protein  
369 folding<sup>22</sup>. Thus, we hypothesized that the RBS might also affect the conformations of proteins by  
370 controlling TIR, thereby achieving fine-tuning of gene expression. To further explore the  
371 relationship between TIR, protein folding, and biosensor dynamic range, a wild-type chaperone  
372 GroEL/S, which could assist in the folding of recombinant sfGFP in *E. coli*, was combined with a

373 set of constructed biosensors<sup>25</sup>. Although there was no one-to-one relationship between the protein  
374 expression level and predicted TIR, a positive correlation trend was noted. In other words, when  
375 compared with low TIR, high TIR not only increased the protein expression, but also produced more  
376 misfolded proteins, which in turn resulted in a higher repair rate of sfGFP by GroEL/S (**Fig. 2a, h**).  
377 Therefore, appropriate protein expression level and protein folding state achieved the optimal  
378 biosensor dynamic range, thus further implying that RBS is one of the key factors affecting the  
379 dynamic range of biosensors.

380 Sequence-based deep learning models had been reported to show good predictive performance  
381 for biological phenotypes<sup>13,32,33</sup>. Deep learning models can accurately establish the correspondence  
382 between genotypes and phenotypes through large datasets, thus making investigations more  
383 universal. The present study found that one of the key factors affecting the dynamic range of  
384 biosensors was RBS. However, the mechanism of the RBS tuning the dynamic range of biosensors  
385 was complex (**Fig. 2a**), not only requiring exploration of the mechanism of RBS tuning translation  
386 and folding of regulators and reporter, but also examination of the binding mechanism of regulators  
387 and operator sites and further investigation of the effects on downstream reporter transcription.  
388 Therefore, analysis of these mechanisms using current technology is a huge challenge. However,  
389 deep learning models do not require understanding of specific mechanisms to establish the  
390 relationship between RBS and biosensor dynamic range, and can be extended to other biosensors  
391 research. Hence, to develop a universal tool to fine-tune the dynamic range of biosensors, we  
392 developed CLM-RDR, a classification model based on deep learning between cRBSs and average  
393 dynamic range. The CLM-RDR showed good prediction performance for the dynamic range of the  
394 biosensor using only less than 24,000 cRBSs datasets. More importantly, it could be extended to  
395 other biosensors, achieving the same prediction effects, implying that CLM-RDR has certain  
396 universality in predicting the dynamic range of biosensors. It should be noted that the present study  
397 only examined the effect of the RBS on biosensor dynamic range. The results of this study, along  
398 with further research on promoters, plasmid copy numbers, and regulatory protein evolution, could  
399 propel fine-tuning of the dynamic range of biosensors into the era of intelligence.

## 400 **ONLINE METHODS**

### 401 **Strains and culture conditions**

402 All strains used in this study are listed in **Supplementary Table 4**. *E. coli* JM109 and *E. coli*  
403 BL21 (DE3) cells were used for plasmid cloning and protein expression, respectively. M9 minimal  
404 medium, consisting of Na<sub>2</sub>HPO<sub>4</sub> (6.78 g/L), KH<sub>2</sub>PO<sub>4</sub> (3.0 g/L), NaCl (0.5 g/L), MgSO<sub>4</sub>·7H<sub>2</sub>O (0.5  
405 g/L), CaCl<sub>2</sub> (0.011 g/L), NH<sub>4</sub>Cl (1.0 g/L), and glucose (5 g/L), was used for fluorescence intensity  
406 assessment. The final concentrations of ampicillin, kanamycin, and spectinomycin employed in this  
407 study were 100, 50, and 50 µg/mL, respectively. The final concentration of isopropyl β-D-  
408 thiogalactoside was 1 mM.

### 409 **Plasmid construction**

410 All plasmids and primers used in this study are listed in **Supplementary Tables 4 and 5**,  
411 respectively. The pJKR-H-*cdar* plasmid for glucarate biosensor was purchased from Addgene  
412 (#62557). In addition to RBS and g10RBS, we selected seven RBSs: RBS3, RBS7, RBS8, MCD2,  
413 MCD10, BBa\_J61100 and BBa\_J61106 (**Supplementary Table 2**). The primer design was based  
414 on the different RBS sequences, and the pJKR-H-*cdar* plasmid was used as the template for plasmid  
415 PCR. Plasmids pJKR-H-RBSs-*cdar*-RBSs (RBSs are represented as R, R3, R7, R8, G10, M2, M10,  
416 BJ00, or BJ06), pJKR-H-RBS<sub>n81</sub>-*cdar*-RBS<sub>m56</sub>, pJKR-H-RBS<sub>n81</sub>-*cdar*-RBS<sub>m97</sub>, and pJKR-H-  
417 RBS<sub>n81</sub>-*cdar*-RBS<sub>m117</sub> were constructed through DpnI digestion, and the digestion products were  
418 introduced into *E. coli* JM109 cells for screening by colony PCR and Sanger sequencing. The  
419 plasmids pJKR-H-R-*cdar*-G10-*lacZ*-his, pJKR-H-R-*cdar*-M10-*lacZ*-his, pJKR-H-R-*cdar*-R8-  
420 *lacZ*-his, NGS-RBS<sub>n</sub>-RBS<sub>m</sub>-I, NGS-RBS<sub>n</sub>-RBS<sub>m</sub>-II, NGS-RBS<sub>n</sub>-RBS<sub>m</sub>-III, NGS-RBS<sub>n</sub>-RBS<sub>m</sub>-  
421 IV, NGS-RBS<sub>n</sub>-RBS<sub>m</sub>-V, and pRSF-*groEL*-*groES* were constructed using with Gibson assembly<sup>34</sup>.  
422 The plasmid pHS-AVC-LW1125 was synthesized by Beijing Syngentech Co., Ltd in china. through  
423 DNA microarray technique.

424 Plasmids containing the glycolate biosensor pUC-*glcC*-ffs and arabinose biosensor pUC-*araC*  
425 were constructed through Gibson assembly methods. In both of the biosensors, the *rrnB* strong  
426 terminator, antibiotic resistance gene, and origin of replication were derived from the glucarate  
427 biosensor (pJKR-H-*cdar*)<sup>4</sup>. All the sequences of transcriptional regulators and their promoters are

428 provided in **Supplementary Table 6**. To evaluate the general performance of the CLM-RDR, we  
429 randomly selected eight RBSs to engineer three biosensors using plasmid PCR method: RBS<sub>cdar</sub>  
430 (R<sub>c</sub>) and g10RBS derived from the glucarate biosensor; BBa\_J61104 (BJ04) and BBa\_J61108 (BJ08)  
431 obtained from the Anderson RBS library; MCD10 generated from the monocistronic design by  
432 Mutalik, *et al*; RBS<sub>glcC</sub> (R<sub>g</sub>) obtained from the glycolate biosensor; and RBS<sub>pRSF</sub> (R<sub>pR</sub>) and RBS<sub>pTrc99a</sub>  
433 (R<sub>pT</sub>) derived from plasmids pRSF and pTrc99a, respectively (**Supplementary Table 6**). The  
434 plasmid construction methods for each biosensor had been described earlier, and the concentrations  
435 of the inducers, glycolate and arabinose, were 70 and 20 mM, respectively (**Supplementary Fig.**  
436 **6**).

### 437 ANOVA model for cRBSs:glucarate combinatorial datasets

438 To understand the contribution and interaction between cRBSs and glucarate in the precise  
439 regulation of biosensors, we performed ANOVA<sup>23</sup> on the following linear model, using fluorescence  
440 data from sfGFP<sup>35</sup>

$$441 \text{ Fluorescence}_{ijk} = \mu + C_i + G_j + (C:G)_{ij} + \varepsilon_{ijk}$$

$$442 \text{ for } i = (1-81); j = (1-12)$$

443 where Fluorescence<sub>ijk</sub> is the fluorescent output signal measured from the translation element, C<sub>i</sub>, and  
444 induced substrate glucarate, G<sub>j</sub>; (C:G)<sub>ij</sub> represents any interaction between the *i*th translational  
445 element and *j*th concentration of glucarate;  $\mu$  is the overall average signal; and  $\varepsilon_{ijk}$  is the error term  
446 for each C:G combination. The analysis output is presented in **Supplementary Table 1**.

### 447 $\beta$ -Galactose activity assays

448 The process of gene deletion in *E. coli* BL21 (DE3) cells was performed as described by Jiang *et*  
449 *al*<sup>36</sup>. The sgRNA of *lacZ* is shown in **Supplementary Table 6**. An appropriate amount of  
450 fermentation broth was centrifuged at 8000  $\times$  *g* for 10 min at 4 °C, the supernatant was discarded,  
451 and the cells were collected. The cells were washed twice with cold lysis buffer (Tris-HCl; 0.01 M,  
452 pH 7.5). Then, the cells were resuspended in 2.5 mL of 0.01 mol/L Tris-HCl buffer (pH 7.5), and  
453 glass beads<sup>37</sup> and 50  $\mu$ L of PMSF stock solution were added to the cell culture. The cell culture was  
454 oscillated six times at high speed for 15 s each and placed on ice intermittently. Subsequently, 2.5  
455 mL of Tris-HCl buffer were added to the culture, and the supernatant collected after centrifugation

456 at  $8000 \times g$  for 15 min at 4 °C was the crude enzyme solution. Next, 1 mM o-nitrophenyl- $\beta$ -D-  
457 galactopyranoside (oNPG) solution was prepared with 50 mM oNPG. Approximately 10  $\mu$ L of the  
458 diluted crude enzyme solution and 20  $\mu$ L of the oNPG solution were added to 70  $\mu$ L of Z-buffer  
459 (16.1 g/L  $\text{Na}_2\text{HPO}_4 \cdot 7\text{H}_2\text{O}$ , 5.5 g/L  $\text{NaH}_2\text{PO}_4 \cdot \text{H}_2\text{O}$ , 0.75 g/L KCl, 0.246 g/L  $\text{MgSO}_4 \cdot 7\text{H}_2\text{O}$ , and 2.7  
460 mL  $\beta$ -mercaptoethanol; pH 7.0, stored at 4 °C) for 10 min at 30 °C. Then, 120  $\mu$ L of 1 mol/L pre-  
461 cooled  $\text{Na}_2\text{CO}_3$  were immediately added to stop the reaction and develop color. Finally, the  
462 absorbance was measured with a spectrophotometer at a wavelength of 420 nm. One unit of enzyme  
463 activity was defined as the amount of enzyme catalyzing the production of 1  $\mu$ mol o-nitrophenol  
464 (oNP) per minute <sup>38, 39</sup>.

465 Bovine serum albumin (BSA) was dissolved in Z-buffer at different dilutions (0.0–0.2 mg/mL  
466 BSA), and standard curves were generated. Crude enzyme (20  $\mu$ L) was added to 200  $\mu$ L of Bradford  
467 reagent, mixed, and its absorbance was determined at a wavelength of 595 nm. The crude enzyme  
468 concentration was calculated with a standard curve. The formula for calculating the enzyme activity  
469 was as follows.  $\text{U/mg protein} = \text{OD}_{420} \times 1.7 / (0.0045 \times \text{protein content} \times \text{crude enzyme volume} \times$   
470  $\text{time})$ , where  $\text{OD}_{420}$  is the optical density of the product oNP at 420 nm, coefficient 1.7 is the  
471 corrected value of the reaction volume, coefficient 0.0045 is the optical density (OD) of 1 mM oNP  
472 solution, protein content is expressed in mg/mL, crude enzyme volume is expressed in mL, and time  
473 is shown in min.

#### 474 **Fluorescence assays**

475 The cells were grown overnight to saturation before being diluted into fresh LB medium at a ratio  
476 of 1:100 and incubated at 250 rpm and 37 °C. After 3 h, 100  $\mu$ L of log-phase cells were transferred  
477 to 96-well plates and stock inducers were respectively added to achieve the desired induction  
478 concentrations. Different concentrations of glucarate, glycolate, and arabinose were obtained by  
479 diluting 100 g/L glucarate, 1 M glycolate, and 1 M arabinose mother liquor in 96-well plates. Before  
480 measurements, the cultures were diluted into 0.01 M phosphate buffered saline (PBS; pH 7.4) to  
481 ensure that the  $\text{OD}_{600}$  value was about 0.5. Measurements were performed using a Biotek HT plate  
482 reader (Winooski, VT, USA) under excitation wavelength of 485/20 nm and emission wavelength  
483 of 528/20 nm at 37 °C and rapid shaking. Fluorescence intensity was measured in arbitrary units  
484 (AU), and the OD was determined by absorbance. For a given measurement, normalized

485 fluorescence was determined by dividing the fluorescence by OD. The ratio of fluorescence to  
486 absorbance at 600 nm was used to compensate for the changes in cell density over time and between  
487 experiments (AU/OD).

488 *E. coli* BL21 (DE3) cells containing the plasmid libraries were cultured to saturation, and then  
489 incubated at a concentration of 1% into 250-mL flasks containing LB medium at 250 rpm and 37 °C.  
490 After 2 h, inducers were added to the desired final concentration, and incubation was resumed for  
491 12 h. The induced cultures were diluted into cold PBS and kept on ice until evaluation with a BD  
492 FACS AriaII cell sorter (Becton Dickinson)<sup>24</sup>. At least 100,000 events were captured for each  
493 sample. BD FACSDiva software was used to divide the gate for sfGFP<sup>35</sup> (bandpass filter, 530/30  
494 nm; blue laser, 488 nm).

### 495 **Construction of the RBS library and NGS analysis**

496 In total, 12,000 cRBS sequences were synthesized using DNA microarray, amplified by PCR, and  
497 were cloned into a glucarate biosensor plasmid backbone (pHS-BVC-LW274 and pHS-BVC-  
498 LW276) via two-step Golden Gate assembly<sup>34</sup> (completed by Synbiotic Gene Company) to obtain  
499 the glucarate biosensor plasmid library. Next, the plasmid library was transformed into *E. coli* BL21  
500 (DE3) cells, which were cultured for 8 h in LB medium with or without 20 g/L glucarate  
501 supplementation. Then, the cells induced with 20 g/L glucarate were divided into five non-adjacent  
502 sub-libraries (I–V), which were compared with the positive control without glucarate induction  
503 according to the fluorescence intensity of sfGFP by FACS. To ensure the reliability of fluorescence  
504 intensity, cell adhesion was removed by executing FSC-A/FSC-H and SSC-A/SSC-H operation.  
505 Finally, the cells from each sub-library were obtained. Although the distance between the two RBSs  
506 in the glucarate biosensor was 2208 bp, NGS was able to measure only up to 250 bp; therefore,  
507 Gibson assembly<sup>34</sup> was used to modify the plasmids of the five sub-libraries. The modified sub-  
508 libraries contained 134 bp between two RBSs (**Supplementary Fig. 4b**), and the mixed PCR  
509 products of the five modified sub-libraries were linked with five barcodes and sequenced by NGS.  
510 Finally, the cRBS sequences and sequence abundance of the five sub-libraries were determined.

### 511 **Deep learning**

512 First, 24,000 cRBS sequences were combined to create datasets for subsequent deep learning.  
513 Then, the fluorescence intensity was divided into five levels for evaluating the biosensor

514 corresponding to the RBS. To classify the RBS sequences, one-hot coding was initially employed.  
515 A neural network model<sup>32, 33</sup> consisting of three convolutional layers and three full connection  
516 layers was proposed to accurately classify the RBS sequences. The convolutional layers comprised  
517 stride 1 and the pooling layers were non-overlapping. The convolution layer included two functions:  
518 feature extraction and feature mapping. On the one hand, the input of each neuron was connected  
519 to the local receptive field of the previous layer, and the local features were extracted. After the local  
520 features were extracted, the positional relationships between them and other features were also  
521 determined. On the other hand, each computing layer of the network was composed of multiple  
522 feature maps, each feature maps into a plane, and all the neurons on the plane exhibited the same  
523 weight. The feature map used the ReLU function with a small kernel of the influence function as  
524 the activation function of the convolution network, so that it had an invariance of displacement.

## 525 **Software and graphics generation**

526 Deep learning was performed with SciPy (1.0.0), NumPy (1.14.0), and TensorFlow (1.9.0) Python  
527 packages.

## 528 **AUTHOR CONTRIBUTIONS**

529 N.D. and Y.D. conceived the study; N.D., X.Z., and Y.D. designed the research; N.D. performed  
530 the experiments; N.D., Z.Y., X.Z., S.Z., J.C., and Y.D. analyzed the data; and N.D., Z.Y., S.Z., and  
531 Y.D. wrote the manuscript.

## 532 **COMPETING INTERESTS**

533 The authors declare no competing financial interest.

## 534 **DATA AND MATERIALS AVAILABILITY**

535 Raw data of NGS for DNA microarray and cRBSs of five sub-libraries have been deposited to the  
536 NCBI Short Read Archive, with Accession No. BioProject: SRR9301216  
537 (<https://dataview.ncbi.nlm.nih.gov/object/SRR9301216>) and SRR9301175  
538 (<https://dataview.ncbi.nlm.nih.gov/object/SRR9301175>), respectively. The code used to predict  
539 biosensor dynamic range can be found at <https://github.com/YuDengLAB/CLM-RDR>.

## 540 **ACKNOWLEDGMENTS**

541 The authors thank Professor Chong Zhang of Tsinghua University for the valuable discussions. This



542 work was supported by the National Natural Science Foundation of China (21877053), National  
543 First-class Discipline Program of Light Industry Technology and Engineering (LITE2018-24), Top-  
544 Notch Academic Programs Project of Jiangsu Higher Education Institutions (TAPP), Fundamental  
545 Research Funds for the Central Universities (JUSRP51705A, JUSRP11964), and Open Project  
546 Program of China-Canada Joint Lab of Food Nutrition and Health, Beijing Technology and Business  
547 University (BTBU) and Jiangsu Province Science Foundation for Youths (BK20150159).

## 548 REFERENCES AND NOTES

- 549 1. Prindle, A. et al. A sensing array of radically coupled genetic ‘biopixels’. *Nature* **481**, 39  
550 (2012).
- 551 2. Eggeling, L., Bott, M. & Marienhagen, J. Novel screening methods—biosensors. *Current*  
552 *opinion in biotechnology* **35**, 30-36 (2015).
- 553 3. Rogers, J.K. & Church, G.M. Genetically encoded sensors enable real-time observation of  
554 metabolite production. *Proc Natl Acad Sci U S A* **113**, 2388 (2016).
- 555 4. Rogers, J.K. et al. Synthetic biosensors for precise gene control and real-time monitoring  
556 of metabolites. *Nucleic Acids Research* **43**, 7648-7660 (2015).
- 557 5. Zhang, F., Carothers, J.M. & Keasling, J.D. Design of a dynamic sensor-regulator system  
558 for production of chemicals and fuels derived from fatty acids. *Nature biotechnology* **30**,  
559 354 (2012).
- 560 6. Nguyen, N.H., Kim, J.-R. & Park, S. Application of Transcription Factor-based 3-  
561 Hydroxypropionic Acid Biosensor. *Biotechnology and Bioprocess Engineering* **23**, 564-  
562 572 (2018).
- 563 7. Skjoedt, M.L. et al. Engineering prokaryotic transcriptional activators as metabolite  
564 biosensors in yeast. *Nature chemical biology* **12**, 951 (2016).
- 565 8. Cheng, F., Tang, X.L. & Kardashliev, T. Transcription factor-based biosensors in high-  
566 throughput screening: advances and applications. *Biotechnology journal* **13**, 1700648  
567 (2018).
- 568 9. Kasey, C., Zerrad, M., Li, Y., Cropp, T.A. & Williams, G.J. Development of transcription  
569 factor-based designer macrolide biosensors for metabolic engineering and synthetic biology.  
570 *Acs Synthetic Biology* **7**, acssynbio.7b00287 (2017).



- 571 10. Levin-Karp, A. et al. Quantifying translational coupling in E. coli synthetic operons using  
572 RBS modulation and fluorescent reporters. *ACS synthetic biology* **2**, 327-336 (2013).
- 573 11. Wang, B., Kitney, R.I., Joly, N. & Buck, M. Engineering modular and orthogonal genetic  
574 logic gates for robust digital-like synthetic biology. *Nature communications* **2**, 508 (2011).
- 575 12. Salis, H.M., Mirsky, E.A. & Voigt, C.A. Automated design of synthetic ribosome binding  
576 sites to control protein expression. *Nature biotechnology* **27**, 946 (2009).
- 577 13. Chen, K.M., Cofer, E.M., Zhou, J. & Troyanskaya, O.G. Selene: a PyTorch-based deep  
578 learning library for sequence data. *Nature methods* **16**, 315 (2019).
- 579 14. Nielsen, A.A. & Voigt, C.A. Deep learning to predict the lab-of-origin of engineered DNA.  
580 *Nature communications* **9**, 3135 (2018).
- 581 15. Westbrook, A.M. & Lucks, J.B. Achieving large dynamic range control of gene expression  
582 with a compact RNA transcription–translation regulator. *Nucleic Acids Research* **45**, 5614-  
583 5624 (2017).
- 584 16. Doong, S.J., Gupta, A. & Klj, P. Layered dynamic regulation for improving metabolic  
585 pathway productivity in Escherichia coli. *Proceedings of the National Academy of Sciences*  
586 *of the United States of America* **115**, 2964 (2018).
- 587 17. Fuzhong, Z. & Jay, K. Biosensors and their applications in microbial metabolic engineering.  
588 *Trends in Microbiology* **19**, 323-329 (2011).
- 589 18. Kim, S.K. et al. A Genetically Encoded Biosensor for Monitoring Isoprene Production in  
590 Engineered Escherichia coli. *ACS synthetic biology* **7**, 2379-2390 (2018).
- 591 19. Baojun, W., Mauricio, B. & Martin, B. Amplification of small molecule-inducible gene  
592 expression via tuning of intracellular receptor densities. *Nucleic Acids Research* **43**, 1955-  
593 1964 (2015).
- 594 20. Srivatsan, R., Rogers, J.K., Taylor, N.D. & Church, G.M. Evolution-guided optimization  
595 of biosynthetic pathways. *Proceedings of the National Academy of Sciences of the United*  
596 *States of America* **111**, 17803 (2014).
- 597 21. Ceroni, F. et al. Burden-driven feedback control of gene expression. *Nature methods* **15**,  
598 387 (2018).
- 599 22. Faure, G., Ogurtsov, A.Y., Shabalina, S.A. & Koonin, E.V. Role of mRNA structure in the

- 600 control of protein folding. *Nucleic acids research* **44**, 10898-10911 (2016).
- 601 23. Mutalik, V.K. et al. Precise and reliable gene expression via standard transcription and  
602 translation initiation elements. *Nature Methods* **10**, 354 (2013).
- 603 24. Sauer, C. et al. Exploring the non-conserved sequence space of synthetic expression  
604 modules in *Bacillus subtilis*. *ACS Synthetic Biology*, acssynbio.8b00110- (2018).
- 605 25. Wang, J.D., Herman, C., Tipton, K.A., Gross, C.A. & Weissman, J.S. Directed evolution of  
606 substrate-optimized GroEL/S chaperonins. *Cell* **111**, 1027-1039 (2002).
- 607 26. Crooks, G.E., Hon, G., Chandonia, J.-M. & Brenner, S.E. WebLogo: a sequence logo  
608 generator. *Genome research* **14**, 1188-1190 (2004).
- 609 27. Nielsen, A.A., Segall-Shapiro, T.H. & Voigt, C.A. Advances in genetic circuit design: novel  
610 biochemistries, deep part mining, and precision gene expression. *Current Opinion in*  
611 *Chemical Biology* **17**, 878-892 (2013).
- 612 28. Nielsen, A.A. et al. Genetic circuit design automation. *Science* **352**, aac7341-aac7341  
613 (2016).
- 614 29. Tae Seok, M., Chunbo, L., Alvin, T., Stanton, B.C. & Voigt, C.A. Genetic programs  
615 constructed from layered logic gates in single cells. *Nature* **491**, 249-253 (2012).
- 616 30. Guo, J., Wang, T., Guan, C., Liu, B. & Xing, X.-H. Improved sgRNA design in bacteria via  
617 genome-wide activity profiling. *Nucleic Acids Research* **46**, 7052-7069 (2018).
- 618 31. Zhou, S., Ding, R., Chen, J., Du, G. & Zhou, J. Obtaining a Panel of Cascade Promoter-5'-  
619 UTR Complexes in *Escherichia coli*. *Acs Synthetic Biology* **6**, 1065-1075 (2017).
- 620 32. Sundaram, L. et al. Predicting the clinical impact of human mutation with deep neural  
621 networks. *Nature Genetics* **50** (2018).
- 622 33. Zhou, J. & Troyanskaya, O.G. Predicting effects of noncoding variants with deep learning-  
623 based sequence model. *Nature methods* **12**, 931 (2015).
- 624 34. Gibson, D. et al. Enzymatic assembly of DNA molecules up to several hundred kilobases.  
625 *Nature Methods* **6**, 343 (2009).
- 626 35. Jean-Denis, P., Stéphanie, C., Timothy, T., Terwilliger, T.C. & Waldo, G.S. Engineering and  
627 characterization of a superfolder green fluorescent protein. *Nature Biotechnology* **24**, 79-  
628 88 (2006).

- 629 36. Jiang, Y. et al. Multigene editing in the Escherichia coli genome via the CRISPR-Cas9  
630 system. *Appl. Environ. Microbiol.* **81**, 2506-2514 (2015).
- 631 37. Ramanan, R.N. & Ariff, L.A.B. The Performance Of A Glass Bead Shaking Technique For  
632 The Disruption Of Escherichiacoli Cells. *Biotechnology & Bioprocess Engineering* **13**,  
633 613-623 (2008).
- 634 38. Liu, P., Wang, W., Zhao, J. & Wei, D. Screening novel  $\beta$ -galactosidases from a sequence-  
635 based metagenome and characterization of an alkaline  $\beta$ -galactosidase for the enzymatic  
636 synthesis of galactooligosaccharides. *Protein expression and purification* **155**, 104-111  
637 (2019).
- 638 39. Schaefer, J., Jovanovic, G., Kotta-Loizou, I. & Buck, M. Single-step method for  $\beta$ -  
639 galactosidase assays in Escherichia coli using a 96-well microplate reader. *Analytical*  
640 *Biochemistry* **503**, 56-57 (2016).

641
